# Supplementary material for: Comprehensive Simulation of Ca2+ Transients in the Continuum of Mouse Skeletal Muscle Fiber Types
Source: MDPI journal article supplement (doi:10.3390/ijms222212378), 2021-11-17
Supplement: s1 [file s1]

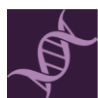

Supplementary Material

# Comprehensive Simulation of $\text{Ca}^{2+}$ Transients in the Continuum of Mouse Skeletal Muscle Fiber Types

Oscar A. Rincón <sup>1,2</sup>, Andrés F. Milán <sup>2</sup> Juan C. Calderón <sup>2</sup> and Marco A. Giraldo <sup>1,\*</sup>

<sup>1</sup> Biophysics Group, Institute of Physics, University of Antioquia, Medellín, Colombia.

<sup>2</sup> Physiology and Biochemistry research Group-PHYSIS, Faculty of Medicine, University of Antioquia, Medellín, Colombia

\* Correspondence: mantonio.giraldo@udea.edu.co; Tel.: +573015440055

The simulation of tetanic  $\text{Ca}^{2+}$  transients was extended during 10 s and the mechanisms that required more time to return to equilibrium are presented in Fig S1. In the sarcoplasm, PV and TNS returned to their resting states after 6 ms. About the same time was required for CSQ in the SR. The mitochondrial buffers require more than 10 ms. The transmembrane fluxes also remained activated for time intervals greater than 6 s. In fibers IIX and IIB, the fluxes maintained their rate for a longer time, presumably due to the  $\text{Ca}^{2+}$  stored in the sarcomplasmic binding sites and in the SR.

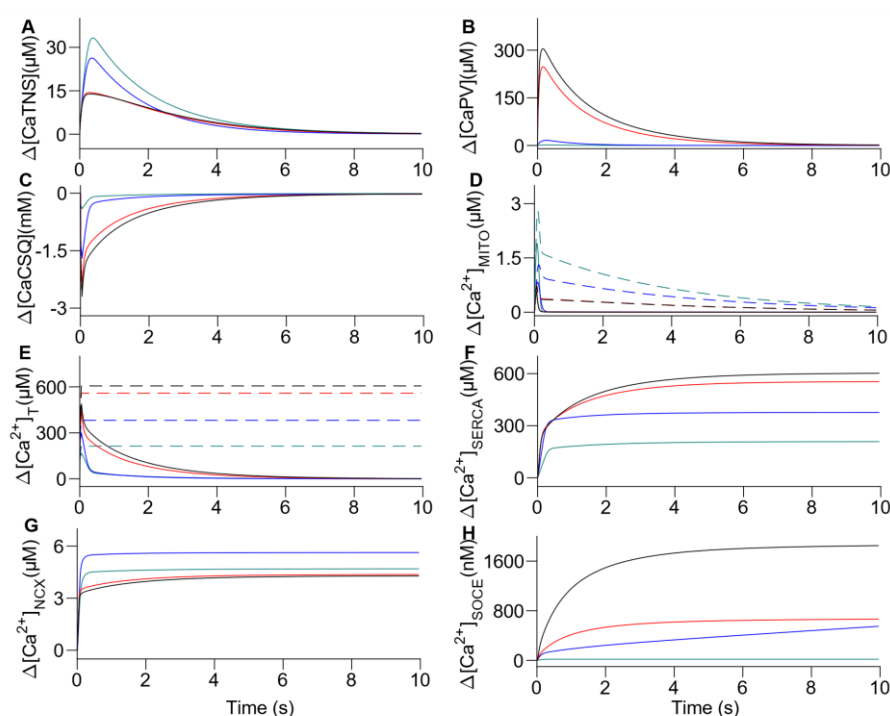

**Figure S1.** Simulation of tetanic  $\text{Ca}^{2+}$  transients during an extended time interval. The  $\Delta[\text{Ca}^{2+}]$  coupled to the high affinity sarcoplasmic buffers: TNS (A) and PV (B); the SR buffer: CSQ (C); the free (solid line) and total  $\Delta[\text{Ca}^{2+}]_{\text{MITO}}$  (dashed line) (D) are shown. The total  $[\text{Ca}^{2+}]$  in the sarcoplasm (solid line) and the total  $[\text{Ca}^{2+}]$  released (dashed line) were obtained following the same procedure as in Fig. 2I (E). The integral of the fluxes in time across the sarcolemma, produced by the SERCA pump, the NCX and the SOCE, were also obtained (F, G, H).

**Table S1.** Rate constants used in the model for  $\text{Ca}^{2+}$  and  $\text{Mg}^{2+}$  binding reactions at 22°C.

| Binding sites          | $k_+$                                              | $k_-$                   | Reference           |
|------------------------|----------------------------------------------------|-------------------------|---------------------|
| $\text{Ca}^{2+}$ -Tn   | $2.68 \times 10^8 \text{ M}^{-1} \text{ s}^{-1}$   | $2340.2 \text{ s}^{-1}$ | [16] & Present work |
| $\text{Ca}^{2+}$ -CaTn | $1.34 \times 10^8 \text{ M}^{-1} \text{ s}^{-1}$   | $25.9 \text{ s}^{-1}$   | [16] & Present work |
| $\text{Ca}^{2+}$ -TNS  | $2.44 \text{ M}^{-1} \text{ s}^{-1}$               | $0.488 \text{ s}^{-1}$  | [13] & Present work |
| $\text{Mg}^{2+}$ -TNS  | $8.12 \text{ M}^{-1} \text{ s}^{-1}$               | $1.62 \text{ s}^{-1}$   | [13] & Present work |
| $\text{Ca}^{2+}$ -PV   | $0.632 \times 10^8 \text{ M}^{-1} \text{ s}^{-1}$  | $0.8 \text{ s}^{-1}$    | [16] & Present work |
| $\text{Mg}^{2+}$ -PV   | $0.5 \times 10^5 \text{ M}^{-1} \text{ s}^{-1}$    | $4.5 \text{ s}^{-1}$    | [16] & Present work |
| $\text{Ca}^{2+}$ -ATP  | $0.2067 \times 10^8 \text{ M}^{-1} \text{ s}^{-1}$ | $45.5 \text{ s}^{-1}$   | [16] & Present work |
| $\text{Ca}^{2+}$ -CSQ  | $44 \times 10^6 \text{ M}^{-1} \text{ s}^{-1}$     | $3446 \text{ s}^{-1}$   | [27] & Present work |
| $\text{Ca}^{2+}$ -B    | $0.6 \times 10^6 \text{ M}^{-1} \text{ s}^{-1}$    | $0.156 \text{ s}^{-1}$  | [14] & Present work |

## References

16. Baylor, S.M.; Hollingworth, S. Simulation of  $\text{Ca}^{2+}$  Movements within the Sarcomere of Fast-Twitch Mouse Fibers Stimulated by Action Potentials. *J. Gen. Physiol.* 2007, 130, 283–302, doi:10.1085/jgp.200709827.
13. Hollingworth, S.; Kim, M.M.; Baylor, S.M. Measurement and simulation of myoplasmic calcium transients in mouse slow-twitch muscle fibres. *J. Physiol.* 2012, 590, 575–594, doi:10.1113/jphysiol.2011.220780.
27. Barclay, C.J.; Launikonis, B.S. Components of activation heat in skeletal muscle. *J. Muscle Res. Cell Motil.* 2021, 42, doi:10.1007/s10974-019-09547-5.
14. Marcucci, L.; Canato, M.; Protasi, F.; Stienen, G.J.M.; Reggiani, C. A 3D diffusional-compartmental model of the calcium dynamics in cytosol, sarcoplasmic reticulum and mitochondria of murine skeletal muscle fibers. *PLoS One* 2018, 13, e0201050, doi:10.1371/journal.pone.0201050.
